# Supplementary material
Source: HighWire-hosted journal article supplement (https://www.rcpjournals.org/highwire/filestream/14168/field_highwire_adjunct_files/0/Dean_supplementary_material_S1.pdf)
Supplement: Dean_supplementary_material_S1.pdf [file Dean_supplementary_material_S1.pdf]

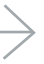

# Ward round fundamentals

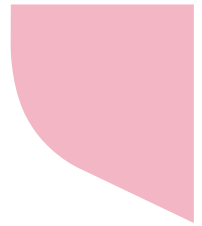

## Key principles

## Summary recommendations

|                                                                                                                                       |                                                                                                                                                                                                                                                                                                                                        |
|---------------------------------------------------------------------------------------------------------------------------------------|----------------------------------------------------------------------------------------------------------------------------------------------------------------------------------------------------------------------------------------------------------------------------------------------------------------------------------------|
| <p><b>Well led</b></p>                               | <ul style="list-style-type: none"><li>Protect and dedicate time for consultant* led delivery.</li><li>Create an environment for active participation of all team members in care planning.</li><li>Agree roles for multidisciplinary team members and their input to ward rounds.</li></ul>                                            |
| <p><b>Structured</b></p>                            | <ul style="list-style-type: none"><li>Schedule a pre-ward round board round, to be attended by the multidisciplinary team.</li><li>Review patients in priority order on ward rounds.</li><li>Use standardised documentation including safety checklists.</li></ul>                                                                     |
| <p><b>Effective teams</b></p>                      | <ul style="list-style-type: none"><li>Schedule ward rounds to prevent conflicts with other ward activities.</li><li>Structure and plan shift handovers to inform board and ward rounds.</li><li>Debrief and handover multidisciplinary plans after the ward round.</li></ul>                                                           |
| <p><b>Patient involvement</b></p>                  | <ul style="list-style-type: none"><li>Actively involve patients in ward rounds, with family and carers as required or requested.</li><li>Agree communication with the patient on progress of their plan following the ward round.</li><li>Plan complex and difficult conversations or assessments outside of the ward round.</li></ul> |
| <p><b>Education, learning and improvement</b></p>  | <ul style="list-style-type: none"><li>Use each ward round as an opportunity for learning.</li><li>Continue to develop the skills required for all staff to actively participate in ward rounds.</li><li>Assess ward round quality against best practice.</li></ul>                                                                     |

\* In some settings this may be senior nurses or therapists (see report case studies)
